# Supplementary material
Source: MDPI journal article supplement (https://www.mdpi.com/2071-1050/13/19/10774)
Supplement: s1 [file s1]

Archive with 2 entries (2 files):
- Iacobuta et al. 2021 - Climate mitigation and the SDGs - Sup. Mat.pdf
- Iacobuta et al. 2021 - Climate mitigation and the SDGs - Sup. Mat.xlsx
