# Supplementary material
Source: MDPI journal article supplement (https://www.mdpi.com/2071-1050/13/19/10774)
Supplement: s1 [file s1 › Iacobuta et al. 2021 - Climate mitigation and the SDGs - Sup. Mat.pdf]

# Transitioning to low-carbon economies under the 2030 Agenda: minimizing trade-offs and enhancing co-benefits of climate action for the SDGs

## Supplementary Material: Literature review on the impacts of climate-change mitigation measures on the SDGs

Gabriela Ileana Iacobuță <sup>1,2\*</sup>, Niklas Höhne <sup>2,3</sup>, Heleen van Soest <sup>4,5</sup> and Rik Leemans <sup>2</sup>

<sup>1</sup> German Development Institute / Deutsches Institut für Entwicklungspolitik (DIE), Tulpenfeld 6, Bonn, Germany;

<sup>2</sup> Environmental Systems Analysis Group, Wageningen University & Research, PO Box 47, Wageningen 6700 AA, Wageningen, Netherlands;

<sup>3</sup> NewClimate Institute, Waidmarkt 11a, 50676, Cologne, Germany;

<sup>4</sup> PBL Netherlands Environmental Assessment Agency, P.O. Box 30314, 2500 GH, The Hague, Netherlands;

<sup>5</sup> Copernicus Institute of Sustainable Development, Utrecht University, P.O. Box 80.115, 3508 TC, Utrecht, Netherlands

\* Correspondence: gabriela.iacobuta@gmail.com; gabriela.iacobuta@die-gdi.de

The sections below present impacts of climate change mitigation measures on specific SDG targets, as identified through literature review. This material includes only direct (first order) impacts and covers relevant SDGs. The language used here suggests whether the impacts are context dependent or independent, through wording such as “could/can/might/may” and “would/do(es)”, respectively. For a visual representation of these impacts and their categorisation based on the scoring method developed in this paper, we recommend consulting the supplementary material in Excel format.

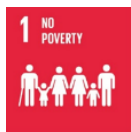

### SDG1 – No poverty

Energy is an essential enabling element to a large number of human activities. For this reason, energy unaffordability was defined here as one dimension of poverty (SDG 1.2). Increase in energy prices due to energy (CO<sub>2</sub>) taxes would lead to a rise in energy poverty among economically vulnerable people if complementary attenuating measures, such as subsidies or exemptions for poor households, are not implemented (Cameron et al., 2016; Hirth & Ueckerdt, 2013). Furthermore, energy price increase can also be the result of use of more expensive energy technologies or of a higher demand for electricity, for instance, through electrification of the transport systems. However, an electrification of the transport

sector may protect the poor from volatile oil prices. While nuclear energy and renewables are competitive with some types of fossil fuels (especially gas) in a few countries, this is not the case everywhere and measures such as feed-in tariffs are still necessary to keep the prices low for the public while making renewables competitive with fossil fuel energy sources. Moreover, waste-to-energy tends to be more expensive than other sources of electricity and heat in most situations (U.S. Department of Energy, 2019). Nevertheless, some renewables have reached price parity and are at times even cheaper than fossil fuels in some countries (Borenstein, 2012; Evans et al., 2009; Hirth & Ueckerdt, 2013; NEA, 2018; Ouyang & Lin, 2014). Moreover, (bioenergy) carbon capture and storage ((BE)CCS) used with power plants would always lead to higher energy costs as the carbon capture and storage system itself requires energy to operate, hence, increasing the energy consumption of the plant (Rubin et al., 2015). Nevertheless, for BECCS this additional required energy could be considered productive as it leads to a carbon sink (negative emissions) rather than just GHG emissions avoidance. On the demand side, upfront costs of energy efficiency improvements would most likely be over-compensated by lower energy needs in the long-run and would lead to lower energy prices. This would decrease energy poverty. For instance, observed rebound-effects (i.e. increased consumption) after improvements in energy efficiency could be an indication that there was a higher need for energy previous to the price decrease and that it was not affordable (assuming that the effect is not a result of energy waste alone) (Cayla & Osso, 2013; Greening et al., 2000; Herring & Roy, 2007; Sorrell, 2007; Ürge-Vorsatz & Tirado Herrero, 2012; Winkler et al., 2002).

While energy unaffordability is an indicator of poverty, the lack of access to energy deprives people of this basic service altogether (SDG 1.4). In that regard, off-grid renewable sources can facilitate coverage of electricity in remote areas (Casillas & Kammen, 2010; Pueyo et al., 2013; REN21, 2016). However, forest and ecosystems conservation and rehabilitation to increase the carbon sink potential can limit access of communities in the area to biomass for energy, as well as land and natural resources (SDG 1.4) that might be essential for their livelihoods (Charnley, 2005). If a reasonable use of resources for energy is allowed,

the communities can benefit from the conservation of respective ecosystems. This is also the case for large photovoltaic (PV), concentrated solar power (CSP), hydropower and biofuel production projects that require large areas of land and, in some cases (most common for hydropower), could additionally lead to communities' displacement and related impoverishment (Dombrowsky et al., 2014; Moore et al., 2010). However, occurrence of these negative impacts depends on the existence of communities in the affected area in the first place.

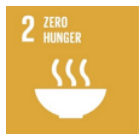

## **SDG2 – Zero hunger**

Policies supporting biofuel production can lead to competition between climate-change mitigation and food security targets (SDG 2.1) by reducing the surface area or increasing the price of land available for agriculture (Finco & Doppler, 2010; Hasegawa et al., 2015, 2018; Lotze-Campen et al., 2014; Lundberg et al., 2015; Rogelj et al., 2018; Smith et al., 2013; Van der Horst & Vermeylen, 2011). Similarly, forest and nature protection can also reduce available land for food production and limit access of vulnerable communities to land and natural resources (SDGs 2.1 and 2.3) (Charnley, 2005; Smith et al., 2010), but communities may benefit if access is allowed. Furthermore, taxes on CO<sub>2</sub> emissions from agriculture would increase food prices (absent subsidies) and limit food affordability.

On the positive side, climate policies that support the use of biofuels and low-emissions agriculture facilitate the introduction of new technologies, infrastructure and knowledge for efficient and sustainable food production (SDG 2.3) (Smith et al., 2014). Examples of such methods and technologies include no-tillage agriculture, which reduces GHG emissions, water evaporation and loss of soil nutrients; optimized water and fertilizer delivery, which reduces GHG emissions, run-off, land-use extent for the same quantity of food, soil erosion and desertification; and direct seeding of rice, which substantially reduces GHG emissions caused by crop water immersion, and water and energy use, and improves soil quality through less soil compaction (World Economic Forum, 2011). These agricultural practices substantially reduce

production costs and required labour, leading to an increased income for farmers (SDG 2.3) and productivity per labour input (SDGs T2.3 and T2.4) for both small- and large-scale farmers (World Economic Forum, 2011). Mixing agricultural and livestock practices can also increase productivity while reducing emissions and demand for land (Bogdanski, 2012; Thornton, 2010). On the downside, this increase in efficiency could reduce agricultural jobs (SDG T2.3). However, emerging bioenergy use can open access to untapped markets and, if adequately implemented, increase small-holder farmers income and jobs (Berndes et al., 2016; Brüntrup et al., 2016; Gohin, 2008) (SDG T2.3).

Agricultural practices for climate-change mitigation make food production systems more sustainable, can help improve ecosystems and soil quality (SDG T2.4) and could consequently increase resilience to changes in climate (Smith et al., 2014; World Economic Forum, 2011). Nonetheless, poorly managed bioenergy monocultures can have the opposite effect by decreasing soil quality, water availability and biodiversity, and hence, weakening ecosystem resilience (Bonsch et al., 2016; Davis et al., 2013; Dias de Oliveira et al., 2005; Finco & Doppler, 2010; von Blottnitz & Curran, 2007). Finally, from a behavioural perspective, decreased food waste and lower consumption of livestock combined with cultivation of food crops instead of feed can increase food availability (Lamb et al., 2016; Tilman & Clark, 2014). The use of more efficient cookstoves that last longer can also enhance food security (Berrueta et al., 2017).

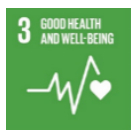

### **SDG3 – Good health and well-being**

A broad spectrum of air pollutants is produced through combustion of fossil fuels and other activities that jointly lead to GHG and other polluting emissions. Hence, tackling GHG emissions directly lowers air pollution (especially NO<sub>x</sub> and SO<sub>x</sub> but also volatile organic compounds, carbon monoxide, black carbon, particulate matter and organic carbon) (Braspenning Radu et al., 2016). Furthermore, climate-change mitigation measures reduce water and soil pollution from leakage during fossil-fuel extraction,

transport, production and use, and from livestock and intensive use of nutrients (Atilgan & Azapagic, 2015; McMichael et al., 2007) (SDGs 3.4, as sources of non-communicable diseases, and SDG 3.9). Examples of GHG emissions measures with positive impacts on air, water and soil pollution are energy-efficiency improvements, use of renewable sources, cleaner transportation, reduction in material and energy demand, reduction in agricultural burning practices and improved cooking stoves, when the assumed business as usual implies the use of fossil fuels (Anenberg et al., 2012, 2013; Creutzig et al., 2012; Haines et al., 2007; Haines & Dora, 2012; International Energy Agency, 2016; von Blottnitz & Curran, 2007; West et al., 2013; Woodcock et al., 2009). A reduced demand for meat would lower the risk of zoonotic pathogens (SDG 3.3) (Klous et al., 2016). Moreover, in countries where meat consumption is high, a lower demand would offer numerous health benefits. Nevertheless, this measure could be problematic in developing countries where the population may not be able to obtain the needed daily nutrients from vegetal sources (Garnett, 2011).

However, measures with potentially negative impacts on air, soil, and water are bioenergy, (BE)CCS, nuclear, gas and geothermal energy sources. The use of bioenergy leads to air pollution, but the net impact on air quality depends on the fuel quality and on the fossil fuel source replaced. Furthermore, bioenergy production might increase the use of fertilizers and consequent emissions to soil and water (Dias de Oliveira et al., 2005). While (BE)CCS reduces  $\text{SO}_x$  and particulate matter, the technology requires additional energy to be operated and this leads to an increase in  $\text{NO}_x$  and  $\text{NH}_3$  (European Environment Agency, 2011). Furthermore, (BE)CCS and nuclear energy pose a risk of  $\text{CO}_2$  and radioactive material leakage, respectively, to air, soil, and water, with potentially catastrophic consequences in the case of nuclear energy (IPCC, 2014). However, outside these very rare events, coal leads to even higher radiation exposure per unit of electricity produced for both the public and workers as compared to nuclear energy (UNSCEAR, 2016; IPCC, 2014; Markandya and Wilkinson, 2007).

The use of renewable energy resources and electric transportation might raise concerns on the increase in pollutants such as cadmium for solar PVs and lithium for batteries, and requires appropriate toxic material management. However, fossil fuel extraction, processing and use lead to substantial emissions of a wide variety of toxic compounds, for instance, mercury and lead (Atilgan & Azapagic, 2015; Duan & Tan, 2013; Pirrone et al., 2010). Some methods of gas extraction, such as fracking, lead to soil and water pollution by injection of water and chemicals into the ground. However, other gas extraction methods might have lower impacts than coal mining and avoid transport-related oil spills (Atilgan & Azapagic, 2015; IPCC, 2014; Jaramillo et al., 2007; Markandya & Wilkinson, 2007). Geothermal energy can lead to emissions of hydrogen sulphide ( $H_2S$ ) and ammonia ( $NH_3$ ) to air and to discharge of thermal and polluted water with dissolved chemicals such as sodium chloride ( $NaCl$ ), boron (B), arsenic (As) and mercury (Hg).  $CO_2$  and  $CH_4$  are also emitted to air (Kristmannsdóttir & Ármannsson, 2003).

Road traffic accidents can be reduced through transport-related climate-change mitigation measures, such as improved urban planning and infrastructure investments to reduce traffic congestion, and modal share switch to increased use of public transport (Creutzig et al., 2012; Haines & Dora, 2012; Pridmore et al., 2017) (SDG 3.6). However, an increased use of silent electric vehicles can negatively affect road safety, if warning sounds are not implemented (IPCC, 2014), while the increased use of bicycles poses an additional accident risk when it is not paired with adequate infrastructure (SDG 3.6). Finally, lower levels of noise and modal switches to active travel modes are likely to have a positive influence on mental and physical health of citizens (Saunders et al., 2013; Woodcock et al., 2009). On the contrary, placement of wind turbines close to households can affect residents through noise and intermittent shadows (Evans et al., 2009). A reduction in meat consumption in areas where consumption is high can also have positive effects on health, reducing risks of non-communicable diseases (Bustamante et al., 2014) (SDG3.4). In energy deprived households, improvements in energy efficiency may increase warmth and reduce

humidity, helping to reduce a series of health risks, such as cardiovascular and respiratory illnesses (Huebner et al., 2013; Zhao et al., 2017).

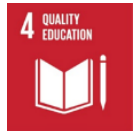

#### **SDG4 – Quality education**

Information and education measures for GHG emissions reduction include environmental product labels, information campaigns and specialized training. These promote sustainable development and sustainable lifestyles, raising public awareness of environmental issues (SDG 4.7). Moreover, education and vocational training directly contribute to the increase in number of people with vocational skills (SDG 4.3, 4.4 and 4.5).

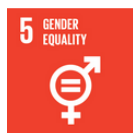

#### **SDG5 – Gender equality**

Measures that support energy efficiency in buildings and more effective cookstoves would particularly benefit women, who tend to spend a disproportionate amount of time at home in most communities (Berrueta et al., 2017). Moreover, as women tend to play an important role in agricultural activities, special attention needs to be given to ensure that regulations in this sector do not overburden women. In particular, agricultural taxes may affect women farmer's income and food availability, but increased productivity could have a positive effect (Jost et al., 2016; Terry, 2009). Similarly, women's reliance on local ecosystem resources for food and wood puts them in a vulnerable situation when conservation measures restrict access, but they can benefit from inclusive ecosystem conservation measures (Katila et al., 2017; Larson et al., 2015).

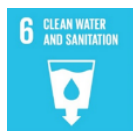

#### **SDG6 – Clean water and sanitation**

Water-use efficiency can be improved through climate-change mitigation policies, such as the elimination of water intensive power plants (e.g. coal-fired power plants), improvements in energy production and use efficiency, and water efficient agriculture, such as precision agriculture and direct

seeding of rice (see examples in SDG2), helping to avoid water-use conflicts (Byers et al., 2014; Chuang et al., 2009; Fricko et al., 2016; Fujimori et al., 2017; Kyle et al., 2013; Reidinger, 1974; Rio Carrillo & Frei, 2009; Spang et al., 2014; World Economic Forum, 2011) (SDGs 6.1 and 6.4). However, measures supporting bioenergy (Bonsch et al., 2016; Fingerman et al., 2011; Mouratiadou et al., 2016; Wu et al., 2009), concentrated solar power (CSP), nuclear (Byers et al., 2014; Chuang et al., 2009; Spang et al., 2014), geothermal (Rybach, 2003; Shortall et al., 2015) and hydro-energy (T. Abbasi & Abbasi, 2011; Kelly-Richards et al., 2017; Premalatha et al., 2014; Zhang et al., 2015) could increase or decrease water use and the access of communities to these resources, depending on the water consumption of the fossil fuel energy options replaced.

Moreover, the above-mentioned measures would positively or negatively affect thermal (except hydropower) and non-thermal water pollution, depending on the energy source they replace (Spang et al., 2014) (SDG 6.3). In that regard, energy efficiency and switching to alternative technologies for cooling (e.g. air-cooling) and electricity production (solar PV and wind) would reduce thermal and non-thermal water pollution (Byers et al., 2014; Fricko et al., 2016; Raptis et al., 2016) (SDG 6.3). Nonetheless, the increase in energy demand at power plants with CCS installed would lead to an increase in energy-related water use and thermal pollution (SDGs 6.1, 6.3 and 6.4). In industrial settings, carbon capture and utilisation (CCU) could be optimized to reduce water demand (Brandl et al., 2017). On the demand side, electric transportation could lead to an increase in water use and thermal pollution if provided electricity comes from water-intensive sources (King & Webber, 2007) (SDGs 6.1, 6.3 and 6.4). Non-thermal water pollution impacts are discussed under SDG3.

Altogether, aforementioned positive impacts as well as protection and restoration of forest areas, peat lands and other ecosystems for climate-mitigation purposes, help preserve fresh water bodies and avoid water quality issues, such as eutrophication (Eory et al., 2017; Smith et al., 2013) (SDG 6.6). Similarly, in

the case of reforestation, original water ecosystems could be restored (Dooley & Kartha, 2018)). Nevertheless, water use for forest plantations can lead to water stress (Kibria, 2015; Lamb et al., 2016). Therefore, in-depth environmental impact assessments need to be undertaken for bioenergy, CSP and nuclear (SDG 6.6) and with particular attention in the case of hydro-energy, tidal and wave energy (SDG 6.6) to ensure water ecosystem impacts are not increased as compared to the replaced fossil fuel energy option (see also SDG15). For instance, in the case of hydro-energy natural areas are inundated to make space for the water reservoirs and the original route of the river might be diverted, leaving some communities without water resources. Furthermore, dams lead to sediment deposition and interfere with freshwater wildlife (T. Abbasi & Abbasi, 2011; Kelly-Richards et al., 2017; Premalatha et al., 2014; Zhang et al., 2015). Similarly, tidal energy may lead to sediment redistribution and affect marine life. However, if appropriately implemented, negative impacts can be minimized and certain benefits can be achieved in support of ocean biodiversity (Gill, 2005; Inger et al., 2009; Neill et al., 2012). In contrast, fossil fuel burning releases nitrogen oxides and sulfur oxides which make water bodies acidic. This is also an issue in the case of biomass and biofuel burning.

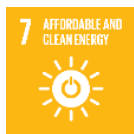

### **SDG7 – Affordable and clean energy**

Climate-change mitigation and SDG7 are strongly interlinked. Firstly, tackling GHG emissions implies increasing the share of low- and zero-carbon energy technologies, such as renewables (SDG 7.2). A second approach to address climate change is to substantially increase energy efficiency and lower energy demand in all sectors (SDG 7.3). Furthermore, both energy-efficiency improvements and renewable energy share increase could lead to more reliable energy systems (energy security) by reducing dependence on limited natural resources, with especially positive effects in countries with high energy imports (Bollen et al., 2010; Cherp et al., 2013; IEA, 2005; McCollum et al., 2013, 2014) (SDG 7.1). However, high reliance on intermittent energy sources and an increased dependency on electricity as final

form of energy across sectors (given increase in, for instance, electric vehicles and electric cookstoves and heaters) could affect the reliability of the energy system (Guivarch & Monjon, 2015; Hung et al., 2016) (SDG 7.1). The increase in diversity of (clean) energy sources and related infrastructure investments would enhance access to modern energy services (here we defined all low-carbon energy sources as modern) (SDG 7.1), but energy affordability may be affected (SDG 7.1), as indicated under SDG1. Finally, renewable energy sources, are more easily introduced in remote areas, enabling broader electricity access (SDG 7.1) as shown under SDG1. However, if forest protection limits communities access to biomass as a source of energy, this could affect both energy access and the level of renewable energy consumed. Finally, reducing food waste and improving agricultural and livestock productivity would reduce energy demand (Kummu et al., 2012; Schader et al., 2015).

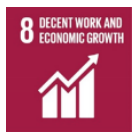

#### **SDG8 – Economic growth and employment**

Avoiding high reliance on fossil-fuel industries that are based on finite resources, would prevent possible future economic disruption caused by resource shortage and price volatility, and as such facilitate a sustained economic growth (SDGs 8.1 and 8.3). In that sense, a switch to non-bioenergy CCS technologies, gas and nuclear energy could hamper economic growth in the long run (Fankhauser et al., 2008; Ferroukhi et al., 2016; IPCC, 2014). Sustained economic growth could be enhanced through a switch to renewable energy sources and a decrease in energy demand. Although the costs of mitigation could slow economic growth in the short-term, low-carbon investments are likely to have positive economic effects in the long-term (Fankhauser et al., 2008; Ferroukhi et al., 2016; IPCC, 2014; The New Climate Economy, 2018). Moreover, sustained economic growth can also be stimulated by an increase in economic productivity (SDG 8.2) and resource efficiency (SDG 8.4) and some climate-change mitigation measures specifically focus on efficiency in production and consumption, such as industrial energy and material use efficiency. However, (BE)CCS increases the use of resources as additional energy is required to run the

technology itself, although this additional energy could be considered productive in BECCS by expanding the carbon sink potential. A comparison of economic productivity between fossil fuel and nuclear and renewables is not suitable given the very different types of limited resources and respective impacts. However, low-carbon transition measures more generally contribute to a sustainable economic growth through a decoupling from resource use and related environmental degradation (SDG 8.4) (see impacts described under SDG 3 and SDG 15). However, adequate environmental assessments need to be conducted to ensure potential risks are avoided.

Forest protection and development projects can generate additional income through enabled economic activities such as pollination and tourism (Katila et al., 2017). Moreover, as tree plantations have a higher rate of timber production, afforestation and reforestation projects can stimulate the economy through timber markets (Kibria, 2015). In general, afforestation and reforestation projects would also create new jobs, even if the timber is not sold.

Technological and infrastructure upgrading (SDG 8.2) for improved productivity, reduced waste and low-carbon energy production are stimulated by climate-mitigation measures across all sectors (Bhattacharya et al., 2016; Mattauch et al., 2015). This demand for new technologies and infrastructure would stimulate economic diversification and innovation (SDGs 8.2 and 8.3) for countries that produce related equipment, including BECCS, although fossil fuel CCS, nuclear and gas could lead to lock-in effects into finite resources and limit capitalization on related investments (Bertram et al., 2015; IPCC, 2014).

The net effect of climate-change mitigation on employment probably differs across countries as jobs created in renewables and energy-efficiency sectors may or may not account for all lost jobs in the fossil-fuel industry (in the same country) and workers may not easily switch between sectors (SDGs 8.5). Nonetheless, studies show that, provided sufficient support for job transition, climate-change mitigation would not pose a threat to current employment rates and would likely have a positive impact on job

numbers (Babiker & Eckaus, 2007; Fankhauser et al., 2008; Ferroukhi et al., 2016; GEA, 2012; ILO, 2010; IPCC, 2014; Kerr et al., 2016; Tirado Herrero et al., 2011; UKERC, 2014). Furthermore, the transition to a low-carbon economy would likely create many decent jobs (SDGs 8.3 and 8.8) in energy efficiency, urban planning and renewables industries (Höhne et al., 2015; ILO, 2010) and lead to more safe and secure working environments through infrastructure upgrading across sectors and a reduction in occupational accidents related to fossil-fuel extraction and transportation (Markandya & Wilkinson, 2007; Steinsvåg et al., 2008; Sumner & Layde, 2009). Vocational training for skills relevant to a low-carbon transition can support the creation of new (decent and safe) jobs where there is demand (Apeaning & Thollander, 2013; Healy & Barry, 2017; Louie & Pearce, 2016). Support for (BE)CCS, nuclear and hydro-energy poses a risk of work-related accidents in the absence of adequate safety measures, such as high levels of CO<sub>2</sub> inhalation, nuclear material leakage and landslide, respectively. However, the risk for nuclear catastrophic events is low. There have been two catastrophic events at nuclear power plants in the past (Chernobyl in 1986 and Fukushima in 2011). In the case of the Fukushima Daiichi accident the doses to the public are generally low or very low and no discernible increased incidence of radiation-related health effects are expected (UNSCEAR, 2013). The Chernobyl accident resulted in the deaths of 28 power plant employees and fireman from acute radiation syndrome and also in excess thyroid cancers among the public (6000 as of 2006) with a small number of fatalities (15 as of 2005). Nonetheless, current reactor designs have improved in safety and an emergency this severe is not considered possible for running nuclear power plants (IAEA, 2016).

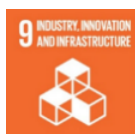

### **SDG9 – Infrastructure and industrialization**

As indicated under SDG8, a low-carbon transition broadly requires investment in reliable, clean, efficient and sustainable infrastructure, retrofitting or closure of old inefficient industries and power plants and infrastructure upgrading (SDGs 9.1, 9.4 and 9.5), as well as a reduction in material and

energy demand (SDG 9.4). Such developments would facilitate sustainable industrialization (SDG 9.2) and stimulate innovation and economic diversification (SDG 9.5), as shown under SDG8. However, except for fossil fuel CCS and agricultural measures, climate change mitigation measures take a toll on existing fossil fuel industries, reducing demand for fossil fuels and in some cases, leading to premature closure of fossil fuel power plants. As indicated under SDG8, if policies that facilitate a smooth low-carbon transition are not implemented, climate mitigation measures can lead to negative economic and employment impacts in countries with significant fossil fuel resources and high employment in the sector and would limit inclusive industrialisation (SDG 9.2) (Johnson et al., 2015; McGlade & Ekins, 2015). Similar trade-offs may also be seen in the livestock industry as a result of increased costs and reduced demand (Eory et al., 2017) and in the energy and agricultural industries, provided energy (GHG) and agricultural GHG taxes.

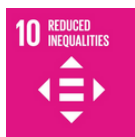

#### **SDG10 – Reducing inequality**

Most impacts presented under SDG 1 and SDG 2 are also directly related to SDG 10, in particular with regard to economic improvements for the bottom 40% of the population based on income (SDG 10.1). Measures that affect access to (affordable) basic services and resources or that have impacts in the area of agriculture would disproportionately target the poor as these are more likely to be dependent on those services and resources and to have their incomes affected by changes in prices, costs or access. On a different note, from a participatory perspective, small-scale renewable energy plants can be developed in a way that benefits individuals and communities, hence, increasing inclusiveness in decision-making and benefits sharing of energy production (Kunze & Becker, 2015; Mccollum et al., 2018).

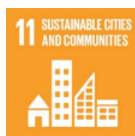

#### **SDG11 – Sustainable cities and communities**

Energy efficiency improvements in buildings require high upfront investments that may lead to a short-term increase in housing costs and limit affordability (SDG 11.1), if not subsidised (Cayla & Osso, 2013). However, the resulting energy savings, improved thermal insulation and other benefits related to

such upgrading would increase the availability of adequate and safe housing (SDG 11.1) (Ürge-Vorsatz & Tirado Herrero, 2012; Winkler et al., 2002). In addition to housing adequacy, energy access and affordability are key elements in the provision of basic services to communities (SDG 11.1) and may be affected by climate change mitigation measures, as described under SDGs 1 and 7. More energy efficient industries could provide waste heat, waste water and electricity to cities, making them more sustainable (Karner et al., 2016).

Transport-related GHG emissions per person kilometre can be reduced, for instance, by improving planning and infrastructure, by stimulating the use of public transport, cycling and walking, or by tackling fuel efficiency and emissions intensity through use of electric vehicles or biofuels. These measures improve transport sustainability and can expand access to public transport (SDG 11.2) (Bhattacharya et al., 2016; Creutzig et al., 2015; United Nations Secretary-General's High-level Advisory Group on Sustainable Transport, 2016). Furthermore, as indicated under SDG3, transport-related climate-change mitigation measures can lead to road safety (SDG 11.2), provided adequate investments in cycling infrastructure and signalling of electric vehicles in low-speed areas.

Cities compactness, energy efficiency and the use of renewables would improve sustainability of human settlements (SDG 11.3) (IPCC, 2014), reduce the environmental impacts of cities (SDG 11.4, see also SDG 15) and improve urban air quality (SDG 11.6). Although the resulting waste from decommissioning of wind turbines (Martínez et al., 2009), and from running power plants and CCS would require additional waste management (SDG 11.6), replacement of coal would reduce radioactive fly and bottom ash waste (Baba, 2002). Moreover, organic municipal waste could be addressed through management of related methane emissions (waste-to-energy systems) (Ayalon et al., 2001; Bogner et al., 2008).

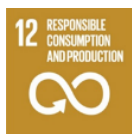

## **SDG12 – Sustainable consumption and production**

Measures for climate-change mitigation addressing consumers through climate-change awareness campaigns, education programs and product-performance labels enhance awareness of sustainable development and related lifestyles (also under SDG4) (SDG 12.8). GHG emissions audits, reporting and monitoring, regulations, fiscal/financial incentives and voluntary agreements are measures that encourage GHG emissions reduction in companies, and hence, improve their sustainability (SDGs 12.2 and 12.6). Similarly, public procurement regulations to support acquisition of low-carbon services and products ensure increased sustainability (SDG 12.7).

Material and energy efficiency, limited resources (e.g. fossil fuels) depletion deceleration, and management of natural resources (e.g. forests), are essential outcomes of GHG emissions reduction measures (SDG 12.2), as shown under SDGs 8 and 9. Nevertheless, replacement of fossil fuels with other energy sources and expansion of EVs can lead to increased demand for rare earth minerals, such as lithium, cobalt, neodymium, palladium, platinum, gallium, dysprosium and other (Buchert et al., 2011). Furthermore, a related outcome of energy and resource efficiency measures is waste reduction (SDG 12.5) that also applies to food waste to address methane emissions (SDG 12.3), as shown under SDG 11, and to waste-to-energy systems. Finally, as shown under SDG3, actions to reduce GHG emissions have a direct impact on air, water and soil pollutants (SDG 12.4).

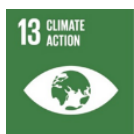

### **SDG13 – Climate action**

SDG13 concerning climate change covers two major aspects: adaptation and mitigation. As this study focuses on the impacts of climate-change mitigation measures (mainly covered in SDG13.2) on other SDGs, direct synergies and trade-offs with climate change adaptation (SDG13.1 and SDG13.2) are also relevant. For instance, managing, conserving and restoring forests and nature areas to increase carbon sinks also improve adaptation of natural and human habitats (Griscom et al., 2017; Verchot et al., 2007) (SDGs 13.1 and 13.2). Similarly, mitigation practices in agriculture likely lead to more resilient food

production systems, although trade-offs could also occur, if biofuels are not sustainably grown, for instance (shown under soil quality in SDG 3) (Aguilera et al., 2013; Smith & Olesen, 2010). Finally, the use of hydropower implies the creation of water reserves which may support adaptation to periods of water scarcity (IPCC, 2014).

The other two targets of SDG13 are also affected by climate mitigation action. All climate change mitigation measures lead to an increase in domestic climate action and integration of climate concerns in national policies (SDG 13.2). Lastly, awareness raising and capacity building through campaigns and trainings are one type of climate action (SDG 13.3).

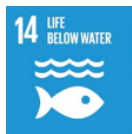

#### **SDG14 – Life under water**

As water bodies around the globe are closely interrelated with oceans, thermal and non-thermal pollution impacts identified under SDG6 would also apply to ocean pollution, even when power plants are not located along the coast (SDG 14.1). However, the economies of countries near marine areas may be stimulated by the use of renewable energy installations, such as off-shore wind turbines and wave and tidal energy conversion, if adequately managed to avoid impacts on ecosystems services (SDG 14.7) (Gilmartin & Allan, 2015; Michler-Cieluch et al., 2009). Conservation of mangrove forests for climate mitigation in themselves support targets of SDG14 (SDG 14.2 and 14.5) and enhance tourism and fish stocks (Joffre et al., 2015; Kibria, 2015; Primavera, 2006; Truong & Do, 2018).

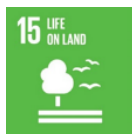

#### **SDG15 – Life on land**

As shown under SDG3, most climate-change mitigation measures decrease air pollution and avoid deposition and leakage of pollutants to soil and water bodies. Furthermore, conservation, restoration and sustainable management of the world's ecosystems, such as wetlands, forests, pastures and agricultural land are important climate-change mitigation measures (SDGs 15.1, 15.2, 15.4, 15.5)

(Griscom et al., 2017; Smith et al., 2013; Swart, 2003; van Zeijts et al., 2017). In addition to protecting and restoring natural areas, adopting sustainable agriculture (e.g. lower use of pesticides and nutrients) (Smith et al., 2013) could expand natural habitats and increase biodiversity (IPCC, 2014) (SDGs 15.4, 15.5).

Furthermore, sustainable agricultural practices to reduce GHG emissions, such as no-tillage and direct seeding, prevent soil degradation and desertification (Smith et al., 2013) (SDG 15.3). Nonetheless, not all agricultural practices are beneficial to ecosystems. For example, large scale monocultures of biofuels can lead to deforestation and reduce habitats and biodiversity (Bonsch et al., 2016; Davis et al., 2013; Dias de Oliveira et al., 2005; Finco & Doppler, 2010; von Blottnitz & Curran, 2007). An integration of crops and livestock can reduce environmental impacts, support soil quality and enhance biological diversity as compared to monocultures (Lemaire et al., 2014; Viaud et al., 2018).

Other forms of renewable energy production could also lead to biodiversity trade-offs. For instance, hydropower and tidal/wave energy may substantially change natural habitats and ecosystems (SDGs 15.4 and 15.5) (Gill, 2005; Inger et al., 2009; IPCC, 2014; Neill et al., 2012). Wind turbines could also have significant impact on the bird populations in the vicinity (Schippers et al., 2020). However, in-depth local environmental assessments are necessary to determine net impacts compared to replaced fossil fuels (Athanas & McCormick, 2013; Rybach, 2003; Shortall et al., 2015; Sliz-Szkliniarz, 2013) (SDGs 15.1, 15.4 and 15.5). Rooftop solar PV and wind are likely to be the most benign of energy sources and would likely have a positive overall impact on ecosystems (S. A. Abbasi & Abbasi, 2000). Improved efficiency of cookstoves and heating with biomass can reduce deforestation for timber (Gebreegziabher et al., 2017; Mehetre et al., 2017; ver Beek et al., 2020). On the contrary, fossil fuel CCS would increase demand for fossil fuels and related trade-offs (but will reduce some air pollutants). Finally, CCS, BECCS and nuclear pose risks of CO<sub>2</sub>, nutrients and radioactive leakage, as previously discussed, but such risks are likely minor compared to potential negative impacts of fossil-fuel use and related upstream activities (see also SDG 3).

## References

- Abbasi, S. A., & Abbasi, N. (2000). The likely adverse environmental impacts of renewable energy sources. *Applied Energy*, 65(1–4), 121–144. [https://doi.org/10.1016/S0306-2619\(99\)00077-X](https://doi.org/10.1016/S0306-2619(99)00077-X)
- Abbasi, T., & Abbasi, S. A. (2011). Small hydro and the environmental implications of its extensive utilization. *Renewable and Sustainable Energy Reviews*, 15(4), 2134–2143. <https://doi.org/10.1016/j.rser.2010.11.050>
- Aguilera, E., Lassaletta, L., Gattinger, A., & Gimeno, B. S. (2013). Managing soil carbon for climate change mitigation and adaptation in Mediterranean cropping systems: A meta-analysis. *Agriculture, Ecosystems and Environment*, 168, 25–36. <https://doi.org/10.1016/j.agee.2013.02.003>
- Anenberg, S. C., Balakrishnan, K., Jetter, J., Masera, O., Mehta, S., Moss, J., & Ramanathan, V. (2013). Cleaner cooking solutions to achieve health, climate, and economic cobenefits. *Environmental Science and Technology*, 47(9), 3944–3952. <https://doi.org/10.1021/es304942e>
- Anenberg, S. C., Schwartz, J., Shindell, D., Amann, M., Faluvegi, G., Klimont, Z., Janssens-maenhout, G., Pozzoli, L., Dingenen, R. Van, Vignati, E., Emberson, L., Muller, N. Z., West, J. J., Williams, M., Demkine, V., Hicks, W. K., Kuylensstierna, J., Raes, F., & Ramanathan, V. (2012). Global Air Quality and Health Co-benefits of Mitigation Near-Term Climate Change through Methane and Black Carbon Emissions Controls. *Environmental and Health Perspectives*, 120(6), 831–839. <https://doi.org/10.1289/ehp.1104301>
- Apeaning, R. W., & Thollander, P. (2013). Barriers to and driving forces for industrial energy efficiency improvements in African industries: a case study of Ghana's largest industrial area. *Journal of Cleaner Production*, 53, 204–213. <https://doi.org/10.1016/j.jclepro.2013.04.003>
- Athanas, A. K., & McCormick, N. (2013). Clean energy that safeguards ecosystems and livelihoods: Integrated assessments to unleash full sustainable potential for renewable energy. *Renewable Energy*, 49, 25–28. <https://doi.org/10.1016/j.renene.2012.01.073>
- Atilgan, B., & Azapagic, A. (2015). Life cycle environmental impacts of electricity from fossil fuels in Turkey. *Journal of Cleaner Production*, 106, 555–564. <https://doi.org/10.1016/j.jclepro.2014.07.046>
- Ayalon, O., Avnimelech, Y., & Shechter, M. (2001). Solid waste treatment as a high-priority and low-cost alternative for greenhouse gas mitigation. *Environmental Management*, 27(5), 697–704. <https://doi.org/10.1007/s002670010180>
- Baba, A. (2002). Assessment of radioactive contaminants in by-products from Yatagan (Mugla, Turkey) coal-fired power plant. *Environmental Geology*, 41(8), 916–921. <https://doi.org/10.1007/s00254-001-0469-8>
- Babiker, M. H., & Eckaus, R. S. (2007). Unemployment effects of climate policy. *Environmental Science and Policy*, 10(7–8), 600–609. <https://doi.org/10.1016/j.envsci.2007.05.002>
- Berndes, G., Abt, B., Asikainen, A., Cowie, A., Dale, V., Egnell, G., Lindner, M., Marelli, L., Paré, D., Pingoud, K., & Yeh, S. (2016). Forest biomass, carbon neutrality and climate change mitigation. In *From Science to Policy 3*. [http://www.efi.int/files/attachments/publications/efi\\_fstp\\_3\\_2016.pdf](http://www.efi.int/files/attachments/publications/efi_fstp_3_2016.pdf)

- Berrueta, V. M., Serrano-Medrano, M., García-Bustamante, C., Astier, M., & Masera, O. R. (2017). Promoting sustainable local development of rural communities and mitigating climate change: the case of Mexico's Patsari improved cookstove project. *Climatic Change*, 140(1), 63–77. <https://doi.org/10.1007/s10584-015-1523-y>
- Bertram, C., Johnson, N., Luderer, G., Riahi, K., Isaac, M., & Eom, J. (2015). Carbon lock-in through capital stock inertia associated with weak near-term climate policies. *Technological Forecasting and Social Change*, 90(PA), 62–72. <https://doi.org/10.1016/j.techfore.2013.10.001>
- Bhattacharya, A., Meltzer, J. P., Oppenheim, J., Qureshi, Z., & Stern, L. N. (2016). *Delivering on Sustainable Infrastructure for Better Development and Better Climate*. <https://www.brookings.edu/research/delivering-on-sustainable-infrastructure-for-better-development-and-better-climate/>
- Bogdanski, A. (2012). Integrated food energy systems for climate-smart agriculture. *Agriculture & Food Security*, 1(9), 1–10.
- Bogner, J., Pipatti, R., Hashimoto, S., Diaz, C., Mareckova, K., Diaz, L., Kjeldsen, P., Monni, S., Faaij, A., Qingxian, G., Tianzhu, Z., Mohammed, A. A., Sutamihardja, R. T. M., & Gregory, R. (2008). Mitigation of global greenhouse gas emissions from waste: Conclusions and strategies from the Intergovernmental Panel on Climate Change (IPCC) Fourth Assessment Report. Working Group III (Mitigation). *Waste Management and Research*, 26(1), 11–32. <https://doi.org/10.1177/0734242X07088433>
- Bollen, J., Hers, S., & van der Zwaan, B. (2010). An integrated assessment of climate change, air pollution, and energy security policy. *Energy Policy*, 38(8), 4021–4030. <https://doi.org/10.1016/j.enpol.2010.03.026>
- Bonsch, M., Humpenöder, F., Popp, A., Bodirsky, B., Dietrich, J. P., Rolinski, S., Biewald, A., Lotze-Campen, H., Weindl, I., Gerten, D., & Stevanovic, M. (2016). Trade-offs between land and water requirements for large-scale bioenergy production. *GCB Bioenergy*, 8(1), 11–24. <https://doi.org/10.1111/gcbb.12226>
- Borenstein, S. (2012). The Private and Public Economics of Renewable Electricity Generation. *The Journal of Economic Perspectives*, 26(1), 67–92. <https://doi.org/http://dx.doi.org/10.1257/jep.26.1.67>
- Brandl, P., Soltani, S. M., Fennell, P. S., & Dowell, N. Mac. (2017). Evaluation of cooling requirements of post-combustion CO<sub>2</sub> capture applied to coal-fired power plants. *Chemical Engineering Research and Design*, 122, 1–10. <https://doi.org/10.1016/j.cherd.2017.04.001>
- Braspenning Radu, O., van den Berg, M., Klimont, Z., Deetman, S., Janssens-Maenhout, G., Muntean, M., Heyes, C., Dentener, F., & van Vuuren, D. P. (2016). Exploring synergies between climate and air quality policies using long-term global and regional emission scenarios. *Atmospheric Environment*, 140, 577–591. <https://doi.org/10.1016/j.atmosenv.2016.05.021>
- Brüntrup, M., Becker, K., Gaebler, M., Herrmann, R., Ostermann, S., & Prothmann, J. (2016). *Policies and Institutions for Assuring Pro-Poor Rural Development and Food Security through Bioenergy Production*.
- Buchert, M., Jenseit, W., Dittrich, S., Hacker, F., Schueker-Hainsch, E., Ruhland, K., Knöfel, S., Goldmann, D., Rasenack, K., & Treffer, F. (2011). *Resource efficiency and resource policy aspects of the electro*

*mobility system. Work package 7 of the OPTUM research project : Environmental Relief.*  
[http://www.resourcefever.org/files/publications/reports/Endbericht\\_OPTUM\\_Ressourcen\\_final\\_EN.pdf](http://www.resourcefever.org/files/publications/reports/Endbericht_OPTUM_Ressourcen_final_EN.pdf)

- Bustamante, M., Robledo-Abad, C., Harper, R., Mbow, C., Ravindranath, N. H., Sperling, F., Haberl, H., De Siqueira Pinto, A., & Smith, P. (2014). Co-benefits, trade-offs, barriers and policies for greenhouse gas mitigation in the agriculture , forestry and other land use ( AFOLU ) sector. *Global Change Biology*, 20, 3270–3290. <https://doi.org/10.1111/gcb.12591>
- Byers, E. A., Hall, J. W., & Amezcaga, J. M. (2014). Electricity generation and cooling water use: UK pathways to 2050. *Global Environmental Change*, 25(1), 16–30. <https://doi.org/10.1016/j.gloenvcha.2014.01.005>
- Cameron, C., Pachauri, S., Rao, N. D., McCollum, D., Rogelj, J., & Riahi, K. (2016). Policy trade-offs between climate mitigation and clean cook-stove access in South Asia. *Nature Energy*, 1(1), 15010. <https://doi.org/10.1038/nenergy.2015.10>
- Casillas, C. E., & Kammen, D. M. (2010). The energy-poverty-climate nexus. *Renewable Energy*, 330(November), 1181–1182. <https://doi.org/10.1126/science.1197412>
- Cayla, J., & Osso, D. (2013). Does energy efficiency reduce inequalities ? Impact of policies in residential sector on household budgets. *ECEEE 2013 Summer Study: Rethink, Renew, Restart*, 1247–1257.
- Charnley, S. (2005). Industrial Plantation Forestry: Do Local Communities Benefit? *Journal of Sustainable Forestry*, 21(4), 59–73. <https://doi.org/10.1300/J091v21n04>
- Cherp, A., Jewell, J., Vinichenko, V., Bauer, N., & De Cian, E. (2013). Global energy security under different climate policies, GDP growth rates and fossil resource availabilities. *Climatic Change*, 1–12. <https://doi.org/10.1007/s10584-013-0950-x>
- Chuang, Y. L., Yang, H. H., & Lin, H. J. (2009). Effects of a thermal discharge from a nuclear power plant on phytoplankton and periphyton in subtropical coastal waters. *Journal of Sea Research*, 61(4), 197–205. <https://doi.org/10.1016/j.seares.2009.01.001>
- Creutzig, F., Baiocchi, G., Bierkandt, R., Pichler, P.-P., & Seto, K. C. (2015). Global typology of urban energy use and potentials for an urbanization mitigation wedge. *Proceedings of the National Academy of Sciences*, 112(20), 6283–6288. <https://doi.org/10.1073/pnas.1315545112>
- Creutzig, F., Mühlhoff, R., & Römer, J. (2012). Decarbonizing urban transport in European cities: Four cases show possibly high co-benefits. *Environmental Research Letters*, 7(044042), 9. <https://doi.org/10.1088/1748-9326/7/4/044042>
- Davis, S. C., Boddey, R. M., Alves, B. J. R., Cowie, A. L., George, B. H., Ogle, S. M., Smith, P., van Noordwijk, M., & van Wijk, M. T. (2013). Management swing potential for bioenergy crops. *GCB Bioenergy*, 5(6), 623–638. <https://doi.org/10.1111/gcbb.12042>
- Dias de Oliveira, M., Burton, E. V., & Rykiel JR., E. J. (2005). Ethanol as Fuel : Energy , Carbon Dioxide Balances , and Ecological Footprint. *BioScience*, 55(7), 593–602.
- Dombrowsky, I., Bastian, J., Däschle, D., Heisig, S., Peters, J., & Vosseler, C. (2014). International and local benefit sharing in hydropower projects on shared rivers: The Ruzizi III and Rusumo Falls cases.

- Water Policy*, 16, 1087–1103. <https://doi.org/10.2166/wp.2014.104>
- Dooley, K., & Kartha, S. (2018). Land-based negative emissions: Risks for climate mitigation and impacts on sustainable development. *International Environmental Agreements: Politics, Law and Economics*, 18(1), 79–98. <https://doi.org/10.1007/s10784-017-9382-9>
- Duan, J., & Tan, J. (2013). Atmospheric heavy metals and Arsenic in China: Situation, sources and control policies. *Atmospheric Environment*, 74, 93–101. <https://doi.org/10.1016/j.atmosenv.2013.03.031>
- Eory, V., Bapasola, A., Bealey, B., Boyd, I., Campbell, J., Cole, L., Glenk, K., Allan, G., Kay, A., MacLeod, M., Moran, D., Moxley, J., Rees, B., Sherrington, C., Topp, K., & Watson, C. (2017). *Evidence review of the potential wider impacts of climate change Mitigation options : Agriculture , forestry, land use and waste sectors. A report prepared for Scottish Government* (Issue January). <https://doi.org/10.13140/RG.2.2.27098.54722>
- European Environment Agency. (2011). Air pollution impacts from carbon capture and storage (CCS). In *Technical Report (Number 14)* (Issue 14). <https://doi.org/10.2800/84208>
- Evans, A., Strezov, V., & Evans, T. J. (2009). Assessment of sustainability indicators for renewable energy technologies. *Renewable and Sustainable Energy Reviews*, 13(5), 1082–1088. <https://doi.org/10.1016/j.rser.2008.03.008>
- Fankhauser, S., Sehlleier, F., & Stern, N. (2008). Climate change, innovation and jobs. *Climate Policy*, 8(4), 421–429. <https://doi.org/10.3763/cpol.2008.0513>
- Ferroukhi, R., Lopez-Peña, A., Kieffer, G., Nagpal, D., Hawila, D., Khalid, A., El-Katiri, L., Vinci, S., & Fernandez, A. (2016). Renewable Energy Benefits: Measuring the Economics. In *IRENA International Renewable Energy Agency*.
- Finco, M. V. A., & Doppler, W. (2010). Bioenergy and sustainable development: The dilemma of food security and climate change in the Brazilian savannah. *Energy for Sustainable Development*, 14(3), 194–199. <https://doi.org/10.1016/j.esd.2010.04.006>
- Fingerman, K. R., Berndes, G., Orr, S., Richter, B. D., & Vugteveen, P. (2011). Impact assessment at the bioenergy-water nexus. *Biofuels, Bioproducts and Biorefining*, 5, 375–386. <https://doi.org/10.1002/bbb>
- Fricko, O., Parkinson, S. C., Johnson, N., Strubegger, M., Vliet, M. T. van, & Riahi, K. (2016). Energy sector water use implications of a 2 °C climate policy. *Environmental Research Letters*, 11(3), 034011. <https://doi.org/10.1088/1748-9326/11/3/034011>
- Fujimori, S., Hanasaki, N., & Masui, T. (2017). Projections of industrial water withdrawal under shared socioeconomic pathways and climate mitigation scenarios. *Sustainability Science*, 12(2), 275–292. <https://doi.org/10.1007/s11625-016-0392-2>
- Garnett, T. (2011). Where are the best opportunities for reducing greenhouse gas emissions in the food system (including the food chain)? *Food Policy*, 36(SUPPL. 1), S23–S32. <https://doi.org/10.1016/j.foodpol.2010.10.010>
- GEA. (2012). *Global Energy Assessment: Toward a Sustainable Future*. <https://doi.org/10.1017/CBO9780511793677>

- Gebreegziabher, Z., Kooten, G. C. Van, & Soest, D. P. Van. (2017). Technological innovation and dispersion : Environmental benefits and the adoption of improved biomass cookstoves in Tigray , northern Ethiopia. *Energy Economics*, 67, 337–345. <https://doi.org/10.1016/j.eneco.2017.08.030>
- Gill, A. B. (2005). Offshore renewable energy: Ecological implications of generating electricity in the coastal zone. *Journal of Applied Ecology*, 42(4), 605–615. <https://doi.org/10.1111/j.1365-2664.2005.01060.x>
- Gilmartin, M., & Allan, G. (2015). Regional Employment Impacts of Marine Energy in the Scottish Economy : A General Equilibrium Approach Regional Employment Impacts of Marine Energy in the Scottish Economy : A General Equilibrium Approach. *Regional Studies*, 49(2), 337–355. <https://doi.org/10.1080/00343404.2014.933797>
- Gohin, A. (2008). Impacts of the European biofuel policy on the farm sector: A general equilibrium assessment. *Review of Agricultural Economics*, 30(4), 623–641. <https://doi.org/10.1111/j.1467-9353.2008.00437.x>
- Greening, L. A., Greene, D. L., & Difiglio, C. (2000). Energy Efficiency and Consumption\the Rebound Effect\ a Survey. *Energy Policy*, 28(6–7), 389–401. [https://doi.org/10.1016/s0301-4215\(00\)00021-5](https://doi.org/10.1016/s0301-4215(00)00021-5)
- Griscom, B. W., Adams, J., Ellis, P. W., Houghton, R. A., Lomax, G., Miteva, D. A., Schlesinger, W. H., Shoch, D., Siikamäki, J. V., Smith, P., Woodbury, P., Zganjar, C., Blackman, A., Campari, J., Conant, R. T., Delgado, C., Elias, P., Gopalakrishna, T., Hamsik, M. R., ... Fargione, J. (2017). Natural climate solutions. *Proceedings of the National Academy of Sciences*, 114(44), 11645–11650. <https://doi.org/10.1073/pnas.1710465114>
- Guivarch, C., & Monjon, S. (2015). Identifying the main uncertainty drivers of energy security in a low-carbon world: The case of Europe. *Energy Economics*, 64, 530–541. <https://doi.org/10.1016/j.eneco.2016.04.007>
- Haines, A., & Dora, C. (2012). How the low carbon economy can improve health. *BMJ: British Medical Journal*, 344(7849), 30–32. <https://doi.org/10.1136/bmj.e1018>
- Haines, A., Smith, K. R., Anderson, D., Epstein, P. R., McMichael, A. J., Roberts, I., Wilkinson, P., Woodcock, J., & Woods, J. (2007). Policies for accelerating access to clean energy, improving health, advancing development, and mitigating climate change. *Lancet*, 370(9594), 1264–1281. [https://doi.org/10.1016/S0140-6736\(07\)61257-4](https://doi.org/10.1016/S0140-6736(07)61257-4)
- Hasegawa, T., Fujimori, S., Havlík, P., Valin, H., Bodirsky, B. L., Doelman, J. C., Fellmann, T., Kyle, P., Koopman, J. F. L., Lotze-Campen, H., Mason-D'Croz, D., Ochi, Y., Pérez Domínguez, I., Stehfest, E., Sulser, T. B., Tabeau, A., Takahashi, K., Takakura, J., van Meijl, H., ... Witzke, P. (2018). Risk of increased food insecurity under stringent global climate change mitigation policy. *Nature Climate Change*, 8(8), 699–703. <https://doi.org/10.1038/s41558-018-0230-x>
- Hasegawa, T., Fujimori, S., Shin, Y., Tanaka, A., Takahashi, K., & Masui, T. (2015). Consequence of Climate Mitigation on the Risk of Hunger. *Environmental Science and Technology*, 49(12), 7245–7253. <https://doi.org/10.1021/es5051748>
- Healy, N., & Barry, J. (2017). Politicizing energy justice and energy system transitions : Fossil fuel

- divestment and a “ just transition ” ☆. *Energy Policy*, 108(June), 451–459.  
<https://doi.org/10.1016/j.enpol.2017.06.014>
- Herring, H., & Roy, R. (2007). Technological innovation, energy efficient design and the rebound effect. *Technovation*, 27(4), 194–203. <https://doi.org/10.1016/j.technovation.2006.11.004>
- Hirth, L., & Ueckerdt, F. (2013). Redistribution effects of energy and climate policy: The electricity market. *Energy Policy*, 62, 934–947. <https://doi.org/10.1016/j.enpol.2013.07.055>
- Höhne, N., Day, T., Fekete, H., & Gonzales, S. (2015). *Assessing the missed benefits of countries’ national contributions: Quantifying potential co-benefits* (Issue March).  
<https://newclimateinstitute.files.wordpress.com/2015/06/cobenefits-of-indcs-june-2015.pdf>
- Huebner, G. M., Cooper, J., & Jones, K. (2013). Domestic energy consumption — What role do comfort , habit , and knowledge about the heating system play ? *Energy & Buildings*, 66, 626–636.  
<https://doi.org/10.1016/j.enbuild.2013.07.043>
- Hung, D. Q., Shah, M. R., & Mithulananthan, N. (2016). Smart Power Systems and Renewable Energy System Integration. In D. Jyaweera (Ed.), *Smart power systems and renewable energy integration* (Vol. 57, pp. 75–97). Springer. <https://doi.org/10.1007/978-3-319-30427-4>
- IAEA. (2016). Safety of nuclear power plants: Design. Specific Safety Requirements No. SSR-2/1 (Rev. 1). In *IAEA Safety Standards* (Vol. 1).
- IEA. (2005). Energy Security and Climate Change Policy Interactions-An Assessment Framework. In *Oil, Gas & Energy Law Journal (OGEL)* (Vol. 3, Issue 1). [https://doi.org/10.1111/j.1745-6584.2009.00625\\_2.x](https://doi.org/10.1111/j.1745-6584.2009.00625_2.x)
- ILO. (2010). *Climate change and labour : The need for a “ just transition ”* (Vol. 2, Issue 2). International Labour Organization (ILO).
- Inger, R., Attrill, M. J., Bearhop, S., Broderick, A. C., James Grecian, W., Hodgson, D. J., Mills, C., Sheehan, E., Votier, S. C., Witt, M. J., & Godley, B. J. (2009). Marine renewable energy: Potential benefits to biodiversity? An urgent call for research. *Journal of Applied Ecology*, 46(6), 1145–1153.  
<https://doi.org/10.1111/j.1365-2664.2009.01697.x>
- International Energy Agency. (2016). Energy and Air Pollution. In *World Energy Outlook - Special Report*.  
<https://doi.org/10.1021/ac00256a010>
- IPCC. (2014). *Climate Change 2014: Mitigation of Climate Change. Contribution of Working Group III to the Fifth Assessment Report of the Intergovernmental Panel on Climate Change* (O. Edenhofer, R. Pichs-Madruga, Y. Sokona, E. Farahani, S. Kadner, K. Seyboth, A. Adler, I. Baum, S. Brunner, P. Eickemeier, B. Kriemann, J. Savolainen, S. Schlömer, C. von Stechow, T. Zwickel, & J. C. Minx (eds.)). Cambridge University Press, Cambridge, United Kingdom and New York, NY, USA.  
<https://doi.org/10.1017/CBO9781107415416>
- Jaramillo, P., Griffin, W. M., & Matthews, H. S. (2007). Comparative life-cycle air emissions of coal, domestic natural gas, LNG, and SNG for electricity generation. *Environmental Science and Technology*, 41(17), 6290–6296. <https://doi.org/10.1021/es063031o>
- Joffre, O. M., Bosma, R. H., Bregt, A. K., Zwieten, P. A. M. Van, Bush, S. R., & Verreth, J. A. J. (2015). What

- drives the adoption of integrated shrimp mangrove aquaculture in Vietnam ? *Ocean and Coastal Management*, 114, 53–63. <https://doi.org/10.1016/j.ocecoaman.2015.06.015>
- Johnson, N., Krey, V., McCollum, D. L., Rao, S., Riahi, K., & Rogelj, J. (2015). Stranded on a low-carbon planet: Implications of climate policy for the phase-out of coal-based power plants. *Technological Forecasting and Social Change*, 90(PA), 89–102. <https://doi.org/10.1016/j.techfore.2014.02.028>
- Jost, C., Kyazze, F., Naab, J., Neelormi, S., Zougmore, R., Aggarwal, P., Bhatta, G., Nelson, S., Kristjanson, P., Jost, C., Kyazze, F., Naab, J., Neelormi, S., Zougmore, R., Aggarwal, P., Bhatta, G., Chaudhury, M., Tapio-bistrom, L., Nelson, S., ... Taylor, P. (2016). Understanding gender dimensions of agriculture and climate change in smallholder farming communities. *Climate and Development*, 8(2), 133–144. <https://doi.org/10.1080/17565529.2015.1050978>
- Karner, K., Theissing, M., & Kienberger, T. (2016). Energy efficiency for industries through synergies with urban areas. *Journal of Cleaner Production*, 119, 167–177. <https://doi.org/10.1016/j.jclepro.2016.02.010>
- Katila, P., de Jong, W., Galloway, G., Pokorny, B., & Pacheco, P. (2017). *Harnessing community and smallholder forestry for Sustainable Development Goals Building on synergies* :
- Kelly-Richards, S., Silber-Coats, N., Crootof, A., Tecklin, D., & Bauer, C. (2017). Governing the transition to renewable energy: A review of impacts and policy issues in the small hydropower boom. *Energy Policy*, 101(May 2016), 251–264. <https://doi.org/10.1016/j.enpol.2016.11.035>
- Kerr, N., Gouldson, A., Barrett, J., Creutzig, F., Baiocchi, G., Bierkandt, R., Pichler, P.-P., Seto, K. C., Hallegatte, S., Rogelj, J., Allen, M., Clarke, L. E., Edenhofer, O., Field, C. B., Friedlingstein, P., Van Kesteren, L., Knutti, R., Mach, K. J., Mastrandrea, M., ... Tol, R. S. J. (2016). Smart Power Systems and Renewable Energy System Integration. *Energy Policy*, 3(4), 1–12. <https://doi.org/10.1017/CBO9781107415324.004>
- Kibria, G. (2015). Climate Resilient Development (CRD), Sustainable Development Goals (SDGs) and Climate Finance (CF) - A Case Study. *Research Gate Online, December*, 1–4. <https://doi.org/10.13140/RG.2.1.4393.2240>
- King, C. W., & Webber, M. E. (2007). The Water Intensity of the Plugged-In Automotive Economy. *Environmental Science and Technology*, 42(12), 4305–4311.
- Klous, G., Huss, A., Heederik, D. J. J., & Coutinho, R. A. (2016). Human-livestock contacts and their relationship to transmission of zoonotic pathogens, a systematic review of literature. In *One Health*. <https://doi.org/10.1016/j.onehlt.2016.03.001>
- Kristmannsdóttir, H., & Ármannsson, H. (2003). Environmental aspects of geothermal energy utilization. *Geothermics*, 32(4–6), 451–461. [https://doi.org/10.1016/S0375-6505\(03\)00052-X](https://doi.org/10.1016/S0375-6505(03)00052-X)
- Kummu, M., de Moel, H., Porkka, M., Siebert, S., Varis, O., & Ward, P. J. (2012). Lost food, wasted resources: Global food supply chain losses and their impacts on freshwater, cropland, and fertiliser use. *Science of the Total Environment*, 438, 477–489. <https://doi.org/10.1016/j.scitotenv.2012.08.092>
- Kunze, C., & Becker, S. (2015). Collective ownership in renewable energy and opportunities for sustainable degrowth. *Sustainability Science*, 10(3), 425–437. <https://doi.org/10.1007/s11625-015->

- Kyle, P., Davies, E. G. R., Dooley, J. J., Smith, S. J., Clarke, L. E., Edmonds, J. A., & Hejazi, M. (2013). Influence of climate change mitigation technology on global demands of water for electricity generation. *International Journal of Greenhouse Gas Control*, 13, 112–123. <https://doi.org/10.1016/j.ijggc.2012.12.006>
- Lamb, A., Green, R., Bateman, I., Broadmeadow, M., Bruce, T., Burney, J., Carey, P., Chadwick, D., Crane, E., Field, R., Goulding, K., Griffiths, H., Hastings, A., Kasoar, T., Kindred, D., Phalan, B., Pickett, J., Smith, P., Wall, E., ... Balmford, A. (2016). The potential for land sparing to offset greenhouse gas emissions from agriculture. *Nature Climate Change*, 6(5), 488–492. <https://doi.org/10.1038/nclimate2910>
- Larson, A. M., Dokken, T., Duchelle, A. E., Atmadja, S., Cronkleton, P., Cromberg, M., Sunderlin, W., Awono, A., & Selaya, G. (2015). The role of women in early REDD + implementation : lessons for future engagement. *International Forestry Review*, 17(1), 43–65.
- Lemaire, G., Franzluebbers, A., César, P., Carvalho, D. F., & Dedieu, B. (2014). Agriculture , Ecosystems and Environment Integrated crop – livestock systems : Strategies to achieve synergy between agricultural production and environmental quality. *Agriculture, Ecosystems and Environment*, 190, 4–8. <https://doi.org/10.1016/j.agee.2013.08.009>
- Lotze-Campen, H., von Lampe, M., Kyle, P., Fujimori, S., Havlik, P., van Meijl, H., Hasegawa, T., Popp, A., Schmitz, C., Tabeau, A., Valin, H., Willenbockel, D., & Wise, M. (2014). Impacts of increased bioenergy demand on global food markets: An AgMIP economic model intercomparison. *Agricultural Economics (United Kingdom)*, 45(1), 103–116. <https://doi.org/10.1111/agec.12092>
- Louie, E. P., & Pearce, J. M. (2016). Retraining investment for U . S . transition from coal to solar photovoltaic employment. *Energy Economics*, 57, 295–302. <https://doi.org/10.1016/j.eneco.2016.05.016>
- Lundberg, L., Jonson, E., Lindgren, K., Bryngelsson, D., & Verendel, V. (2015). A cobweb model of land-use competition between food and bioenergy crops. *Journal of Economic Dynamics and Control*, 53, 1–14. <https://doi.org/10.1016/j.jedc.2015.01.003>
- Markandya, A., & Wilkinson, P. (2007). Electricity generation and health. *Lancet*, 370(9591), 979–990. [https://doi.org/10.1016/S0140-6736\(07\)61253-7](https://doi.org/10.1016/S0140-6736(07)61253-7)
- Martínez, E., Sanz, F., Pellegrini, S., Jiménez, E., & Blanco, J. (2009). Life cycle assessment of a multi-megawatt wind turbine. *Renewable Energy*, 34(3), 667–673. <https://doi.org/10.1016/j.renene.2008.05.020>
- Mattauch, L., Creutzig, F., & Edenhofer, O. (2015). Avoiding carbon lock-in: Policy options for advancing structural change. *Economic Modelling*, 50, 49–63. <https://doi.org/10.1016/j.econmod.2015.06.002>
- McCollum, D., Bauer, N., Calvin, K., Kitous, A., & Riahi, K. (2014). Fossil resource and energy security dynamics in conventional and carbon-constrained worlds. *Climatic Change*, 123(3–4), 413–426. <https://doi.org/10.1007/s10584-013-0939-5>
- McCollum, D., Krey, V., Riahi, K., Kolp, P., Grubler, A., Makowski, M., & Nakicenovic, N. (2013). Climate

- policies can help resolve energy security and air pollution challenges. *Climatic Change*, 119(2), 479–494. <https://doi.org/10.1007/s10584-013-0710-y>
- Mccollum, D. L., Echeverri, L. G., Busch, S., Pachauri, S., & Parkinson, S. (2018). Connecting the sustainable development goals by their energy inter-linkages. *Environmental Res*, 13(3).
- McGlade, C., & Ekins, P. (2015). The geographical distribution of fossil fuels unused when limiting global warming to 2°C. *Nature*, 517(7533), 187–190. <https://doi.org/10.1038/nature14016>
- McMichael, A. J., Powles, J. W., Butler, C. D., & Uauy, R. (2007). Food, livestock production, energy, climate change, and health. *Lancet*, 370(9594), 1253–1263. [https://doi.org/10.1016/S0140-6736\(07\)61256-2](https://doi.org/10.1016/S0140-6736(07)61256-2)
- Mehetre, S. A., Panwar, N. L., Sharma, D., & Kumar, H. (2017). Improved biomass cookstoves for sustainable development : A review. *Renewable and Sustainable Energy Reviews*, 73, 672–687. <https://doi.org/10.1016/j.rser.2017.01.150>
- Michler-Cieluch, T., Krause, G., & Buck, B. H. (2009). Reflections on integrating operation and maintenance activities of offshore wind farms and mariculture. *Ocean and Coastal Management*, 52(1), 57–68. <https://doi.org/10.1016/j.ocecoaman.2008.09.008>
- Moore, D., Dore, J., & Gyawali, D. (2010). The World Commission on Dams + 10: Revisiting the large dam controversy. *Water Alternatives*, 3(2), 3–13.
- Mouratiadou, I., Biewald, A., Pehl, M., Bonsch, M., Baumstark, L., Klein, D., Popp, A., Luderer, G., & Kriegler, E. (2016). The impact of climate change mitigation on water demand for energy and food: An integrated analysis based on the Shared Socioeconomic Pathways. *Environmental Science and Policy*, 64, 48–58. <https://doi.org/10.1016/j.envsci.2016.06.007>
- NEA. (2018). The Full Costs of Electricity Provision. In *The Full Costs of Electricity Provision*. <https://doi.org/10.1787/9789264303119-en>
- Neill, S. P., Jordan, J. R., & Couch, S. J. (2012). Impact of tidal energy converter (TEC) arrays on the dynamics of headland sand banks. *Renewable Energy*, 37(1), 387–397. <https://doi.org/10.1016/j.renene.2011.07.003>
- Ouyang, X., & Lin, B. (2014). Levelized cost of electricity (LCOE) of renewable energies and required subsidies in China. *Energy Policy*, 70, 64–73. <https://doi.org/10.1016/j.enpol.2014.03.030>
- Pirrone, N., Cinnirella, S., Feng, X., Finkelman, R. B., Friedli, H. R., Leaner, J., Mason, R., Mukherjee, A. B., Stracher, G. B., Streets, D. G., & Telmer, K. (2010). Global mercury emissions to the atmosphere from anthropogenic and natural sources. *Atmospheric Chemistry and Physics*, 10(13), 5951–5964. <https://doi.org/10.5194/acp-10-5951-2010>
- Premalatha, M., Abbasi, T., Abbasi, T., & Abbasi, S. A. (2014). A critical view on the eco-friendliness of small hydroelectric installations. *Science of the Total Environment*, 481(1), 638–643. <https://doi.org/10.1016/j.scitotenv.2013.11.047>
- Pridmore, A., Ahlgren, C., Hampshire, K., & Smith, A. (2017). *Evidence Review of the Potential Wider Impacts of Climate Change Mitigation Options: Transport sector. Report to the Scottish Government* (Issue January).

- Primavera, J. H. Ñ. (2006). Overcoming the impacts of aquaculture on the coastal zone. *Ocean and Coastal Management*, 49, 531–545. <https://doi.org/10.1016/j.ocecoaman.2006.06.018>
- Pueyo, A., González, F., Dent, C., & DeMartino, S. (2013). *The evidence of benefits for poor people of increased renewable electricity capacity: Literature review. September 2013*, 145. [https://opendocs.ids.ac.uk/opendocs/bitstream/handle/123456789/2961/ER31\\_Final\\_Online.pdf?sequence](https://opendocs.ids.ac.uk/opendocs/bitstream/handle/123456789/2961/ER31_Final_Online.pdf?sequence)
- Raptis, C. E., Van Vliet, M. T. H., & Pfister, S. (2016). Global thermal pollution of rivers from thermoelectric power plants. *Environmental Research Letters*, 11(10). <https://doi.org/10.1088/1748-9326/11/10/104011>
- Reidinger, R. B. (1974). Institutional Rationing of Canal Water in Northern India : Conflict between Traditional Patterns and Modern Needs Author ( s ): Richard B . Reidinger Source : Economic Development and Cultural Change , Vol . 23 , No . 1 ( Oct . , 1974 ) , pp . 79-104 Publis. *Economic Development and Cultural Change*, 23(1), 79–104. <http://www.jstor.org/stable/1153144> Accessed:
- REN21. (2016). Renewables 2016 Global Status Report. In *Global Status Report*. REN21. <https://doi.org/ISBN 978-3-9818107-0-7>
- Rio Carrillo, A. M., & Frei, C. (2009). Water: A key resource in energy production. *Energy Policy*, 37(11), 4303–4312. <https://doi.org/10.1016/j.enpol.2009.05.074>
- Rogelj, J., Popp, A., Calvin, K. V., Luderer, G., Emmerling, J., Gernaat, D., Fujimori, S., Strefler, J., Hasegawa, T., Marangoni, G., Krey, V., Kriegler, E., Riahi, K., van Vuuren, D. P., Doelman, J., Drouet, L., Edmonds, J., Fricko, O., Harmsen, M., ... Tavoni, M. (2018). Scenarios towards limiting global mean temperature increase below 1.5 °C. *Nature Climate Change*, 8, 325–332. <https://doi.org/10.1038/s41558-018-0091-3>
- Rubin, E. S., Davison, J. E., & Herzog, H. J. (2015). The cost of CO<sub>2</sub> capture and storage. *International Journal of Greenhouse Gas Control*, 40, 378–400. <https://doi.org/10.1016/j.ijggc.2015.05.018>
- Rybach, L. (2003). Geothermal energy: Sustainability and the environment. *Geothermics*, 32(4), 463–470. [https://doi.org/10.1016/S0375-6505\(03\)00057-9](https://doi.org/10.1016/S0375-6505(03)00057-9)
- Saunders, L. E., Green, J. M., Petticrew, M. P., Steinbach, R., & Roberts, H. (2013). What Are the Health Benefits of Active Travel? A Systematic Review of Trials and Cohort Studies. *PLoS ONE*, 8(8). <https://doi.org/10.1371/journal.pone.0069912>
- Schader, C., Muller, A., El-Hage Scialabba, N., Hecht, J., Isensee, A., Erb, K. H., Smith, P., Makkar, H. P. S., Klocke, P., Leiber, F., Schwegler, P., Stolze, M., & Niggli, U. (2015). Impacts of feeding less food-competing feedstuffs to livestock on global food system sustainability. *Journal of the Royal Society Interface*, 12(113). <https://doi.org/10.1098/rsif.2015.0891>
- Schippers, P., Buij, R., Schotman, A., Verboom, J., Jeugd, H. Van Der, & Jongejans, E. (2020). Mortality limits used in wind energy impact assessment underestimate impacts of wind farms on bird populations. *Ecology and Evolution*, 10, 6274–6287. <https://doi.org/10.1002/ece3.6360>
- Shortall, R., Davidsdottir, B., & Axelsson, G. (2015). Geothermal energy for sustainable development: A review of sustainability impacts and assessment frameworks. *Renewable and Sustainable Energy Reviews*, 44, 391–406. <https://doi.org/10.1016/j.rser.2014.12.020>

- Sliz-Szkliniarz, B. (2013). Assessment of the renewable energy-mix and land use trade-off at a regional level: A case study for the Kujawsko-Pomorskie Voivodship. *Land Use Policy*, 35, 257–270. <https://doi.org/10.1016/j.landusepol.2013.05.018>
- Smith, P., Bustamante, M., Krug, T., Nabuurs, G.-J., Molodovskaya Canada, M., Bustamante, M., Ahammad, H., Clark, H., Dong, H., Elsiddig, E. A., Haberl, H., Harper, R., House, J., Jafari, M., Masera, O., Mbow, C., Ravindranath, N. H., Rice, C. W., Robledo Abad, C., ... Minx, J. (2014). IPCC Fifth Assessment Report: Agriculture, Forestry and Other Land Use (AFOLU). In *IPCC, 2014: Climate Change 2014: Mitigation of Climate Change. Contribution of Working Group III to the Fifth Assessment Report of the Intergovernmental Panel on Climate Change The Working Group III contribution to the Fifth Assessment Report (AR5)*.
- Smith, P., Gregory, P. J., van Vuuren, D., Obersteiner, M., Havlik, P., Rounsevell, M., Woods, J., Stehfest, E., & Bellarby, J. (2010). Competition for land. *Philosophical Transactions of the Royal Society B: Biological Sciences*, 365(1554), 2941–2957. <https://doi.org/10.1098/rstb.2010.0127>
- Smith, P., Haberl, H., Popp, A., Erb, K. H., Lauk, C., Harper, R., Tubiello, F. N., De Siqueira Pinto, A., Jafari, M., Sohi, S., Masera, O., Böttcher, H., Berndes, G., Bustamante, M., Ahammad, H., Clark, H., Dong, H., Elsiddig, E. A., Mbow, C., ... Rose, S. (2013). How much land-based greenhouse gas mitigation can be achieved without compromising food security and environmental goals? *Global Change Biology*, 19(8), 2285–2302. <https://doi.org/10.1111/gcb.12160>
- Smith, P., & Olesen, J. E. (2010). Synergies between the mitigation of, and adaptation to, climate change in agriculture. *Journal of Agricultural Science*, 148(5), 543–552. <https://doi.org/10.1017/S0021859610000341>
- Sorrell, S. (2007). The Rebound Effect: an assessment of the evidence for economy-wide energy savings from improved energy efficiency. In *UK Energy Research Centre* (Vol. 42, Issue October). <http://www.ncbi.nlm.nih.gov/pubmed/24690348>
- Spang, E. S., Moomaw, W. R., Gallagher, K. S., Kirshen, P. H., & Marks, D. H. (2014). The water consumption of energy production: An international comparison. *Environmental Research Letters*, 9(10). <https://doi.org/10.1088/1748-9326/9/10/105002>
- Steinsvåg, K., Bråtveit, M., Moen, B., Austgulen, L. V.-T., Hollund, B. E., Haaland, I. M., Nærheim, J., Svendsen, K., & Kromhout, H. (2008). Expert assessment of exposure to carcinogens in Norway's offshore petroleum industry. *Journal of Exposure Science and Environmental Epidemiology*, 18(2), 175–182. <https://doi.org/10.1038/sj.jes.7500578>
- Sumner, S. A., & Layde, P. M. (2009). Expansion of renewable energy industries and implications for occupational health. *JAMA - Journal of the American Medical Association*, 302(7), 787–789. <https://doi.org/10.1001/jama.2009.1214>
- Swart, R. (2003). Climate change and sustainable development: expanding the options. *Climate Policy*, 3(December 2014), S19–S40. <https://doi.org/10.1016/j.clipol.2003.10.010>
- Terry, G. (2009). No climate justice without gender justice : an overview of the issues. *Gender & Development*, 17(1), 5–18. <https://doi.org/10.1080/13552070802696839>
- The New Climate Economy. (2018). *Unlocking the inclusive growth story of the 21st century: accelerating climate action in urgent times*.

- Thornton, P. K. (2010). Livestock production: Recent trends, future prospects. *Philosophical Transactions of the Royal Society B: Biological Sciences*, 365(1554), 2853–2867. <https://doi.org/10.1098/rstb.2010.0134>
- Tilman, D., & Clark, M. (2014). Global diets link environmental sustainability and human health. *Nature*, 515(7528), 518–522. <https://doi.org/10.1038/nature13959>
- Tirado Herrero, S., Ürge-Vorsatz, D., Arena, D., & Telegdy, A. (2011). Co-benefits quantified: employment, energy security and fuel poverty implications of the large-scale, deep retrofitting of the Hungarian building stock. *ECEEE 2011 Summer Study*, 1213–1224. [file:///C:/Users/abisello/Documents/EURAC/Formazione/Dottorato UniPD/Materiali/Co-benefits/Adri/5-250\\_Tirado\\_Herrero.pdf](file:///C:/Users/abisello/Documents/EURAC/Formazione/Dottorato UniPD/Materiali/Co-benefits/Adri/5-250_Tirado_Herrero.pdf)
- Truong, T. D., & Do, L. H. (2018). Mangrove forests and aquaculture in the Mekong river delta. *Land Use Policy*, 73, 20–28. <https://doi.org/10.1016/j.landusepol.2018.01.029>
- U.S. Department of Energy. (2019). *Waste-to-Energy from Municipal Solids Wastes* (Issue August). <https://www.energy.gov/sites/prod/files/2019/08/f66/BETO--Waste-to-Energy-Report-August--2019.pdf>
- UKERC. (2014). *Low carbon jobs: The evidence for net job creation from policy support for energy efficiency and renewable energy*. <https://ukerc.ac.uk/publications/low-carbon-jobs-the-evidence-for-net-job-creation-from-policy-support-for-energy-efficiency-and-renewable-energy/>
- United Nations Secretary-General's High-level Advisory Group on Sustainable Transport. (2016). *Mobilizing Sustainable Transport for Development* (p. 72).
- UNSCEAR. (2013). *Sources, effects and risks of ionizing radiation 2013. Volume I, Scientific Annex A: Vol. I*.
- UNSCEAR. (2016). *Sources, effects and risks of ionizing radiation. Scientific Annexes*. [http://www.unscear.org/docs/publications/2016/UNSCEAR\\_2016\\_Annex-B.pdf](http://www.unscear.org/docs/publications/2016/UNSCEAR_2016_Annex-B.pdf)
- Ürge-Vorsatz, D., & Tirado Herrero, S. (2012). Building synergies between climate change mitigation and energy poverty alleviation. *Energy Policy*, 49, 83–90. <https://doi.org/10.1016/j.enpol.2011.11.093>
- Van der Horst, D., & Vermeulen, S. (2011). Spatial scale and social impacts of biofuel production. *Biomass and Bioenergy*, 35(6), 2435–2443. <https://doi.org/10.1016/j.biombioe.2010.11.029>
- van Zeijts, H., Prins, A. G., Dammers, E., Vonk, M., Bouwma, I., Farjon, H., & Pouwels, R. (2017). *European nature in the plural. Finding common ground for a next policy agenda*.
- ver Beek, N., Vindel, E., Heun, M. K., & Brockway, P. E. (2020). Quantifying the Environmental Impacts of Cookstove Transitions : A Societal Exergy Analysis Based Model of Energy Consumption and Forest Stocks in Honduras. *Energies*, 13(3206), 1–22. <https://doi.org/10.3390/en13123206>
- Verchot, L. V., Van Noordwijk, M., Kandji, S., Tomich, T., Ong, C., Albrecht, A., Mackensen, J., Bantilan, C., Anupama, K. V., & Palm, C. (2007). Climate change: Linking adaptation and mitigation through agroforestry. *Mitigation and Adaptation Strategies for Global Change*, 12(5), 901–918. <https://doi.org/10.1007/s11027-007-9105-6>

- Viaud, V., Santillàn-carvantes, P., Akkal-cor, N., Le, C., Prévost-bouré, N. C., Ranjard, L., & Menasseri-aubry, S. (2018). Agriculture , Ecosystems and Environment Landscape-scale analysis of cropping system e f f e c t s on soil quality in a context of crop-livestock farming. *Agriculture, Ecosystems and Environment*, 265, 166–177. <https://doi.org/10.1016/j.agee.2018.06.018>
- von Blottnitz, H., & Curran, M. A. (2007). A review of assessments conducted on bio-ethanol as a transportation fuel from a net energy, greenhouse gas, and environmental life cycle perspective. *Journal of Cleaner Production*, 15(7), 607–619. <https://doi.org/10.1016/j.jclepro.2006.03.002>
- West, J. J., Smith, S. J., Silva, R. A., Naik, V., Zhang, Y., Adelman, Z., Fry, M. M., Anenberg, S., Horowitz, L. W., & Lamarque, J. F. (2013). Co-benefits of mitigating global greenhouse gas emissions for future air quality and human health. *Nature Climate Change*, 3(10), 885–889. <https://doi.org/10.1038/nclimate2009>
- Winkler, H., Spalding-fecher, R., Tyani, L., & Matibe, K. (2002). Cost – benefit analysis of energy efficiency in urban low-cost housing. *Development Southern Africa*, 19(5), 593–614. <https://doi.org/10.1080/0376883502200001938>
- Woodcock, J., Edwards, P., Tonne, C., Armstrong, B. G., Ashiru, O., Banister, D., Beevers, S., Chalabi, Z., Chowdhury, Z., Cohen, A., Franco, O. H., Haines, A., Hickman, R., Lindsay, G., Mittal, I., Mohan, D., Tiwari, G., Woodward, A., & Roberts, I. (2009). Public health benefits of strategies to reduce greenhouse-gas emissions: urban land transport. *The Lancet*, 374(9705), 1930–1943. [https://doi.org/10.1016/S0140-6736\(09\)61714-1](https://doi.org/10.1016/S0140-6736(09)61714-1)
- World Economic Forum. (2011). *Water security: The water-food-energy climate nexus* (D. Waughray & J. G. Workman (eds.)). Island Press, Washington DC, Covelo, London. <https://doi.org/10.5822/978-1-61091-026-2>
- Wu, M., Mintz, M., Wang, M., & Arora, S. (2009). Water consumption in the production of ethanol and petroleum gasoline. *Environmental Management*, 44(5), 981–997. <https://doi.org/10.1007/s00267-009-9370-0>
- Zhang, J., Xu, L., & Li, X. (2015). Review on the externalities of hydropower: A comparison between large and small hydropower projects in Tibet based on the CO<sub>2</sub> equivalent. *Renewable and Sustainable Energy Reviews*, 50, 176–185. <https://doi.org/10.1016/j.rser.2015.04.150>
- Zhao, D., Mccoy, A. P., Du, J., Agee, P., & Lu, Y. (2017). Interaction effects of building technology and resident behavior on energy consumption in residential buildings. *Energy & Buildings*, 134, 223–233. <https://doi.org/10.1016/j.enbuild.2016.10.049>
