# Supplementary material
Source: MDPI journal article supplement (https://www.mdpi.com/2071-1050/13/19/10774)
Supplement: s1 [file s1 › Iacobuta et al. 2021 - Climate mitigation and the SDGs - Sup. Mat.xlsx]

## Sheet: Info&Methods
	Transitioning towards a low-carbon economy under the 2030 Agenda
	Supplementary material: Interactive framework of climate-change mitigation measures impacts on the SDGs
	Gabriela Ileana Iacobuţă 1,2*, Niklas Höhne 2,3, Heleen van Soest 4,5 and Rik Leemans 2
	1 German Development Institute / Deutsches Institut für Entwicklungspolitik (DIE), Tulpenfeld 6, Bonn, Germany;
	2 Environmental Systems Analysis Group, Wageningen University & Research, PO Box 47, Wageningen 6700 AA, Wageningen, Netherlands;
	3 NewClimate Institute, Waidmarkt 11a, 50676, Cologne, Germany;
	4 PBL Netherlands Environmental Assessment Agency, P.O. Box 30314, 2500 GH, The Hague, Netherlands;
	5 Copernicus Institute of Sustainable Development, Utrecht University, P.O. Box 80.115, 3508 TC, Utrecht, Netherlands
	* Correspondence: gabriela.iacobuta@gmail.com; gabriela.iacobuta@die-gdi.de
	Impact dependence scoring approach
	This study identifies impacts of climate change mitigation measures on other development areas. However, the main focus is on 'first-order' impacts and does not take into account 'second-order' impacts that may occur as a result of the 'first-order' impacts. An example of a 'second-order' impact is the potential improvement in education in areas where electricity access is expanded through (off-g…
	2	1	0	-1	-2
	Climate-change mitigation action always leads to the specified positive impact. However, the impact strength depends on the local context, implementation approach, and country needs and opportunities.	Climate-change mitigation action can lead to a positive impact, if an enabling environment exists. Occurrence of this impact depends on the local context and implementation approach.	The impact direction depends on country-specific context and other existing policies. The impact can become a (direct/enabling) synergy or trade-off depending on these factors.	Climate-change mitigation action can lead to a negative impact, if an enabling environment exists. Occurrence of this impact depends on the local context and implementation approach.	Climate-change mitigation action always leads to the specified negative impact. However, the impact strength depends on the local context, implementation approach, and country needs and opportunities.	No direct impact identified. There may still be second-order impacts as a result of direct impacts.
	Context scoring approach
	Time horizon, T (when) à This dimension indicates that an impact may manifest in the opposite direction in the short term as opposed to the long term.
	Local (geographical), L (where) à This dimension indicates that the impact’s occurrence or magnitude would be influenced by the location where a specific project is implemented, or where a measure takes effect.
	Governance, G (how) à This dimensions indicates that the occurrence and strength of the impact is related to the implmentations approach through: choice or technology or (guidelines on) processes (e.g. recycling, use of fertilizer or not); applicability of policy (i.e.groups of stakeholders that are affected or exempt)
	Natural resources, N (what) à This dimension was introduced to cater for impacts that do not depend on available natural resources locally, but rather nationally.

## Sheet: SDG_Master
	Impact direction and context dependence
	Note: Click on the impact cells for further information.
	Env	Environmental dimension
	Eco	Economic dimension
	Soc	Social dimenstion
	Development areas		Affordable energy (poverty)	Energy access	Land access	Food availability	Agricultural jobs	Agricultural productivity	Farmers' income	Agri. infrastructure/knowledge	Resilient and sust. agriculture	Communicable diseases	Non-communicable diseases	Mental health	Road safety	Non-thermal water pollution	Air quality	Soil quality	Training and education	Female discrimination	Domestic work support	Water efficiency & access	Thermal water pollution	Water ecosystems	Modern energy sources	Reliable energy	Renewable energy	Energy efficiency	Sustained economic growth	Economic diversification	Tech./infrastructure upgrade	Economic productivity	Decent/safe jobs	Resource efficiency	Growth w/out env. degradation	Job creation	Sustainable infrastructure	Sustainable industrialization	Inclusive industrialization	Bottom 40% income growth	Inclusiveness	Adequate housing	Affordable housing	Public transport	Sustainable transport	Sustainable settlements	Ecosystems/nature conservation	Environmetal impact of cities	Waste management
	SDG targets Climate measures		1.2 7.1 11.1	1.4 7.1 11.1	1.4 2.3	2.1	2.3	2.3 2.4	2.3	2.3	2.4	3.3	3.4	3.4	3.6 11.2	3.9 6.3 14.1	3.9 11.6 12.4	3.9 12.4 15.3	4.3 4.4 4.5 4.7 12.8	5.1	5.4	6.1 6.4	6.3 14.1	6.6 15.1	7.1	7.1	7.2	7.3	8.1 8.3	8.2 8.3 9.5	8.2 9.5	8.2	8.3 8.8	8.4 9.4 12.2 12.5	8.4	8.5	9.1 9.2	9.2	9.2	10.1	10.2	11.1	11.1	11.2	11.2	11.3	11.4 15.1 15.5	11.6	11.6 12.5
	Switch to low-carbon fuels (for electricity, heat and transport)	Solar PV	0, T, L	1, L	-1, L											2, L, G	2, L	2, L, G				2, L	2, L	2, L, G	2, L	0, L, G, N	2, L		2, T, L, N	1, G	2, L, G		2, G	0, L, G	2, L, G	0, T, L, G, N	2, G	2, G	-1, G, N	1, L, G	1, L, G				1, L	2, L	1, L, G	2, L, G	0, G
		Solar CSP	-1, T, L	1, L	-1, L											2, L, G	2, L	2, L				0, L, G	0, L, G	0, L, G	2, L	0, L, G, N	2, L		2, T, L, N	1, G	2, L, G		2, G	0, L, G	2, L, G	0, T, L, G, N	2, G	2, G	-1, G, N	1, L, G	1, L, G				1, L	2, L	1, L, G	2, L, G
		Solar heating	1, T, L	1, L												2, L	2, L	2, L				2, L	2, L	2, L	2, L	0, L, G, N	2, L		2, T, L, N	1, G	2, L, G		2, G	2, L, G	2, L, G	0, T, L, G, N	2, G	2, G	-1, G, N	1, L, G	1, L, G					2, L	2, L, G	2, L, G
		Wind	0, T, L	1, L										-1, L		2, L	2, L	2, L				2, L	2, L	2, L	2, L	0, L, G, N	2, L		2, T, L, N	1, G	2, L, G		2, G	0, L, G	2, L, G	0, T, L, G, N	2, G	2, G	-1, G, N	1, L, G	1, L, G				1, L	2, L	2, L, G	2, L, G	0, G
		Geothermal	0, T, L	1, L												0, L, G	0, L	0, L, G				2, L	0, L, G	0, L, G	2, L	2, N	2, L		2, T, L, N	1, G	2, L, G		2, G	2, L, G	2, L, G	0, T, L, G, N	2, G	2, G	-1, G, N	1, L, G	1, L, G				1, L	2, L	2, L, G	2, L, G
		Geothermal heat pumps	0, T	1, L												2, L	2, L	2, L				2, L	2, L	2, L	2, L	2, N	2, L		2, T, L, N	1, G	2, L, G		2, G	2, L, G	2, G	0, T, L, G, N	2, G	2, G	-1, G, N	1, L, G	1, L, G					2, L	2, L, G	2, L, G
		Hydroenergy	0, T, L	1, L	-1, L											-1, L, G	2, L	2, L, G				0, L, G	2, L	-1, L, G	2, L	2, N	2, L		2, T, L, N	1, G	2, L, G		0, G	2, L, G	0, L, G	0, T, L, G, N	2, G	2, G	-1, G, N	1, L, G	1, L, G				1, L	2, L	-1, L, G	0, L, G
		Biofuel/Wood biomass	-1, T, L	1, L	-1, L	-1, L, G	1, G		1, G	1, L,G	-1, L, G					-1, L, G	0, L, G	-1, L. G				0, L, G	0, L, G	-1, L, G	2, L	1, N	2, G		2, T, N	1, G	2, L, G		2, G	0, L, G	0, L, G	0, L, G, N	2, G	2, G	-1, G, N	1, L, G	1, L, G				1, L	2, L	0, L, G	0, L, G
		Tidal/Wave	-1, T, L	1, L												2, L	2, L	2, L				2, L	2, L	2, L	2, L	0, L, G, N	2, L		2, T, L, N	1, G	2, L, G		2, G	2, L, G	2, L, G	0, T, L, G, N	2, G	2, G	-1, G, N						1, L	2, L	0, L, G	1, L, G
		Nuclear	0, T, N													0, L, G	0, L, G	0, L, G				0, L, G	0, L, G	0, L, G	2, L	0, N	-1, G		-1, N	0, T, G	2, L, G		0, G	0, G	0, L, G	0, L, G, N	0, G	0, G	-1, G, N						0, T, L	0, G	0, L, G	0, L, G	-1, G
		Fossil fuel CCS	-2 , T, N													-2, L, G	0, L, G	-2, L				-2, L, G	-2, G	-2, L, G	2, L	-2, N	-1, G	-2, G	-2, N	0, T, G	2, L, G	-2, G	0, G	0, G	0, L, G	2, L, G, N	0, G	0, G	2, G, N						-1, T, L	0, G	-1, L, G, N	-1, G, N	-2, G
		Bioenergy CCS	-1, T, L, G		-1, L	-1, L, G	1, G		1, G	1, L,G	-1, L, G					-1, L, G	0, L, G	-1, L, G				-2, L, G	-2, L, G	-2, L, G	2, L	1, N	2, G	0, G	2, T, N	1, G	2, L, G	0, G	0, G	0, L, G	0, L, G	0, L, G, N	2, L, G	2, G	-1, G, N	1, L, G					1, L	2, L	0, L, G	0, L, G
		Gas	-2, T, N													0, L, G	1, L	0, L, G				0, L, G	0, L, G	0, L, G	2, L	0, N	-1, G		-2, N	0, T, G	2, L, G		0, G	0, G	0, L, G	0, L, G, N	0, G	0, G	-1, G, N						-1, T, L	0, G	0, L, G, N	0, G, N
		Waste-to-energy & landfill	-1, T, L, N	1, L								1, G				2, L, G	0, L, G	0, L, G				0, L, G	0, L, G	0, L, G	2, L	0, N	-1, G		2, T, N	1, G	2, L, G		0, G	1, G	0, L, G	0, L, G, N	1, G	1, G	-1, G, N	1, L, G	1, L, G					2, G	0, L, G	0, L, G	2, G
		Electric vehicles	-1, G											2, L	-1, L, G	0, L, G	1, L, G	0, L, G				0, L, G	0, L	0, L, G		0, L, N			1, T, G	1, G	2, G		0, G	0, G	0, L, G	0, L, G, N	1, L	1, L, G	0, L, N						1, L	1, L	0, L, G	0, L, G	0, G
	Changing activity & non-energy	Industry (material efficiency)														2, L	2, L	2, L				2, L	2, L	2, L					2, T, G	1, G	2, L, G	2, G	2, G	2, G	2, G	0, T, L, G, N	2, G	2, G	-1, G, N								2, L, G	2, G	1, G
		Industry non-energy															2, L												0, G	1, G	2, L, G	0, G	2, G		2, L, G	2, G	2, G	2, G	2, G								2, L, G	2, L, G	-1, G
		Industrial CCS/CCU														0, L, G	0, L, G	-1, L, G				0, L, G	0, G	0, L, G	1, L, G	-1, G		0, G	0, G	1, G	2, L, G	0, G	-1, G	0, G	0, L, G	2, G, N	0, G	-1, G	2, G, N								0, L, G	0, L, G
		Buildings														2, L	2, L	2, L				2, L	2, L	2, L					2, T, N	1, G	2, L, G	2, G	2, G	2, G	2, L	0, L, G, N	2, G	2, L, G	-1, G, N							2, L, G	2, L	2, L	2, G
		Transport demand reduction												1, L	1, G	2, L	2, L	2, L				2, L	2, L	2, L					2, T, N	1, G	2, L, G	2, G	2, G		2, L	0, G, N	2, G	1, L, G	-1, G, N							2, L, G	2, L	2, L
		Modal share switch												0, L, G	1, G	2, L	2, L	2, L				2, L	2, L	2, L					2, T, N	1, G	2, L, G		2, G	1, L	2, L	0, L, G, N	2, G	1, G	-1, G, N	1, L, G				1, G	2, L, G	2, L, G	2, L, G	2, L, G
	Energy efficiency	Electricity/heat	1, T, G													2, L	2, L	2, L				2, L	2, L	2, L				2, G	2, T, N	1, G	2, L, G	2, T, G	2, G	2, G	2, L	0, L, G, N	2, G	2, L, G	-1, G, N						1, L	2, L, G	2, L, G	2, L, G	2, G
		Industry	1, T, G													2, L	2, L	2, L				2, L	2, L	2, L				2, G	2, T, N	1, G	2, L, G	2, T, G	2, G	2, G	2, L	0, L, G, N	2, G	2, L, G	-1, G, N							1, L, G	2, L	2, L	2, G
		Buildings	2, T, G			1, L							1, L			2, L	2, L	2, L		1, L	1, L	2, L	2, L	2, L				2, G	2, T, N	1, G	2, L, G	2, T, G	2, G	2, G	2, L	0, L, G, N	2, G	2, L, G	-1, G, N			2, L, G	-1, T, G			2, L, G	2, L	2, L	2, G
		Transport	2, T													2, L	2, L	2, L				2, L	2, L	2, L				2, G	2, T, N	1, G	2, L, G	2, T, G	2, G	2, G	2, L	0, G, N	2, G	2, L, G	-1, G, N						2, G	2, L, G	2, L	2, L	2, G
	AFOLU	Agriculture			1, L	1, G	-1, G	1, G	1, G	1, G	2, G					2, L, G	2, L	2, L		0, L, G		0, L, G		0, L, G				0, L, G	2, L, G	1, G	1, L, G	2, G		2, L, G	2, L, G	-1, G	2, G		-1, G	1, L, G							1, L, G	1, L, G	1, G
		Livestock-crops integration			1, L	1, G		1, G	1, G	1, G	1, L, G							1, L, G		0, L, G								1, L, G	2, L, G	1, G	1, L, G	1, L, G		2, L, G			2, G		0, L, G	1, L, G							1, L, G	1, L, G
		Livestock reduction			1, L	0, L, G					1, L, G	2, L, G	0, L			2, L		-1, L				2, L		2, L				1, L, G	0, N	0, G, N				2, L					-1, G	-1, G							1, L, G	1, L, G	1, G
		Forest protection	0, L, G	0, L, G	-1, L, G	0, L, G										2, L	2, L			0, L. G				2, L			-1, G		1, T, G						2, L	1, G				0, L, G	1, L, G						1, L	1, L
		Re/afforestation	1, L, G	1, L, G	-1, L, G	0, T, L, G			0, T, L, G		1, L, G					2, L	2, L			0, L, G		0, L, G		0, L, G			1, G		1, T, G	1, G			2, G		2, L, G	2, L, G		1, G		0, L, G	1, L, G						0, L, G	0, L, G
	Taxes & other	Energy (GHG) tax	-2, G																										-1, G										-1, G	-1, G
		Agriculture GHG tax				-2, G			-2, G											-1, L, G																			-1, G	-1, G
		Education/Awareness																	2, G														1, G			1, G
[truncated: 6 more columns]
